# Supplementary material
Source: PubMed Central journal article supplement (PMC2770885)
Supplement: NIHMS152242-supplement-1_si_001.pdf [file NIHMS152242-supplement-1_si_001.pdf]

## Supplementary Information

### Deuterium Spin Probes of Backbone Order in Proteins: A $^2\text{H}$ NMR Relaxation Study of Deuterated Carbon $\alpha$ Sites

Devon Sheppard,<sup>‡</sup> Da-Wei Li,<sup>§</sup> Rafael Brüschweiler,<sup>§</sup> and Vitali Tugarinov<sup>‡</sup>

<sup>‡</sup>*Department of Chemistry and Biochemistry, University of Maryland, College Park, Maryland 20742, and* <sup>§</sup>*Chemical Sciences Laboratory, Department of Chemistry and Biochemistry and the National High Magnetic Field Laboratory, Florida State University, Tallahassee, Florida 32306*

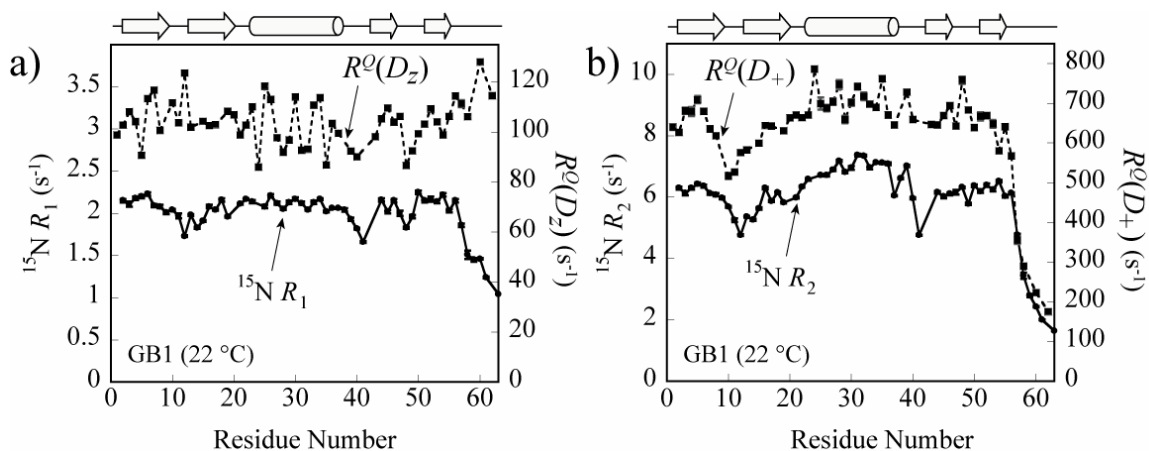

**Figure S1.** Plots of  $D^\alpha$  (black rectangles and dashed lines) and  $^{15}\text{N}$  (black circles and solid lines) relaxation rates in GB1 (22°C) shown as a function of the protein sequence: **a)**  $R^Q(D_z)$  and  $^{15}\text{N } R_1$  rates; **b)**  $R^Q(D_+)$  and  $^{15}\text{N } R_2$  rates. Schematic representation of the secondary structure is shown at the top of the plots:  $\beta$ -strands are depicted with arrows, while  $\alpha$ -helices are represented with cylinders.

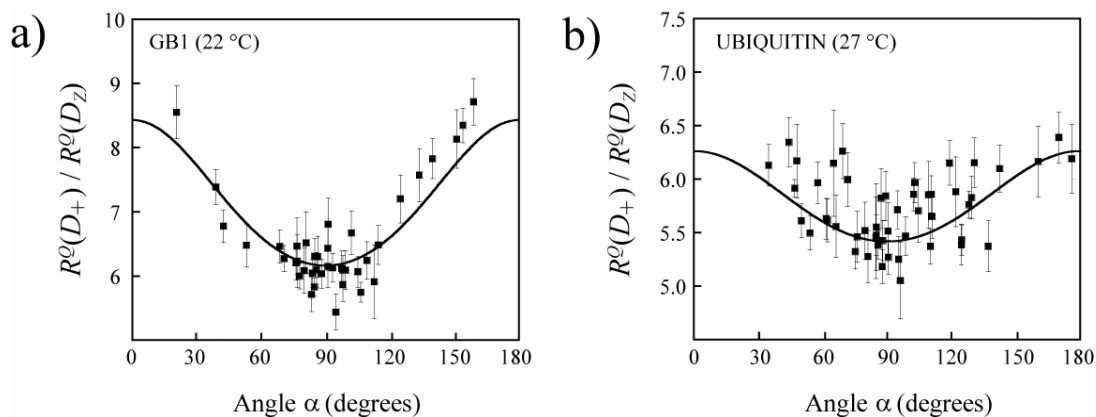

**Figure S2.** Plots of  $R^O(D_+)/R^O(D_z)$  as a function of the angle  $\alpha$  that each of the  $C^\alpha$ - $D^\alpha$  bond vectors subtends with respect to the unique axis of the diffusion tensor, along with the best fits of the data for **a)** GB1 (22°C), and **b)** ubiquitin (27°C). Direction cosines have been extracted from  $C^\alpha$ - $H^\alpha$  vector coordinates using protonated crystallographic structures of ubiquitin and GB1 with respective pdb accession codes 1ubq.pdb<sup>1</sup> and 2qmt.pdb<sup>2</sup>.

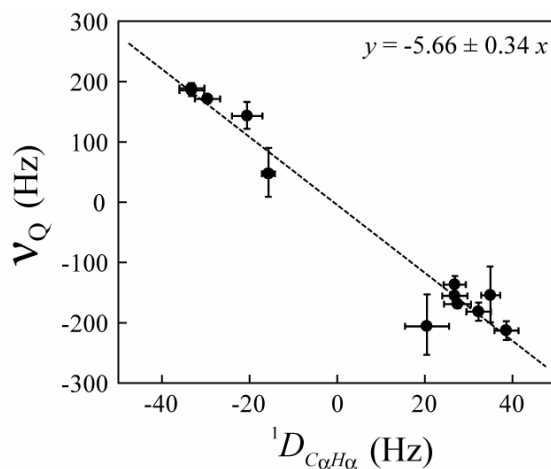

**Figure S3.** The correlation plot of the  $^2\text{H}$  quadrupolar splitting,  $\nu_Q$  ( $y$ -axis, Hz), with the  $^1D_{C\alpha-H\alpha}$  residual dipolar couplings ( $x$ -axis, Hz) in the subset of 11 residues of GB1. The best fit is shown with a dashed line. The values of  $\nu_Q$  and  $^1D_{C\alpha-H\alpha}$  have been assumed to have opposite signs.

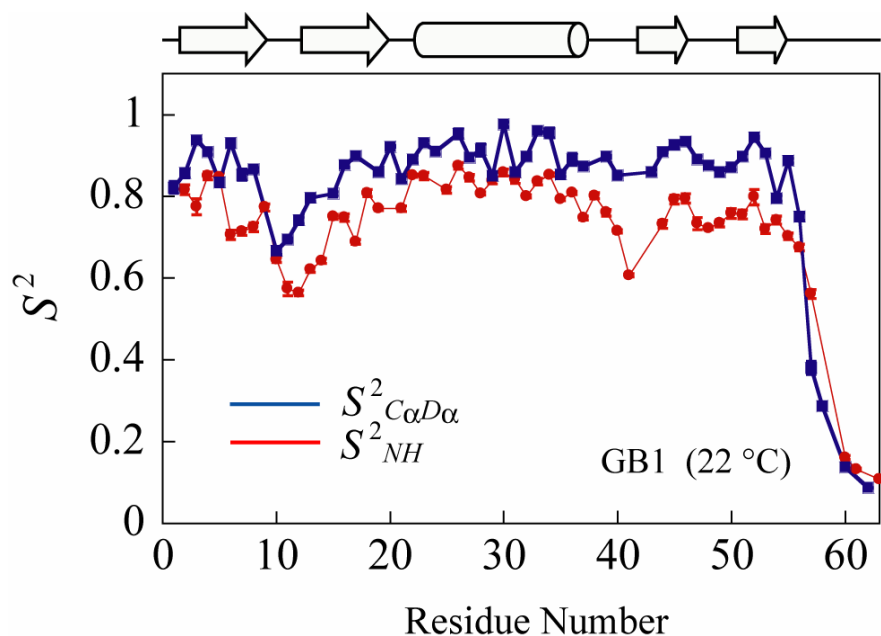

**Figure S4.** D<sup>α</sup>-derived  $S^2_{C\alpha D\alpha}$  (blue rectangles and lines) and <sup>15</sup>N-derived  $S^2_{NH}$  (red circles and lines) in GB1 (22°C) plotted as a function of protein sequence. A schematic representation of the secondary structure of GB1 is shown at the top of the plot: β-strands are depicted with arrows, while α-helices are represented with cylinders.

**Table S1.**  $S^2_{C\alpha D\alpha}$  and  $\tau_f$  Values in Human Ubiquitin Derived from Analysis of D<sup>α</sup> <sup>2</sup>H Relaxation rates at 10°C, 27°C and 40°C.<sup>a)</sup>

|     | $S^2_{C\alpha-D\alpha}$<br>10°C | $\tau_f(\text{ps})^b$<br>10°C | $S^2_{C\alpha-D\alpha}$<br>27°C | $\tau_f(\text{ps})^b$<br>27°C | $S^2_{C\alpha-D\alpha}$<br>40°C | $\tau_f(\text{ps})^b$<br>40°C |
|-----|---------------------------------|-------------------------------|---------------------------------|-------------------------------|---------------------------------|-------------------------------|
| M1  | 0.89 (0.01)                     | -                             | 0.85 (0.01)                     | -                             | 0.82 (0.01)                     | -                             |
| Q2  | 0.89 (0.01)                     | -                             | 0.81 (0.01)                     | -                             | 0.82 (0.01)                     | -                             |
| I3  | -                               | -                             | 0.89 (0.01)                     | 82.7 (43.1)                   | 0.93 (0.01)                     | -                             |
| F4  | 0.94 (0.01)                     | -                             | 0.92 (0.01)                     | -                             | 0.83 (0.05)                     | 232.3 (51.3)                  |
| V5  | 0.85 (0.01)                     | -                             | 0.82 (0.02)                     | 136.9 (71.2)                  | 0.83 (0.01)                     | -                             |
| K6  | 0.87 (0.01)                     | -                             | 0.84 (0.01)                     | -                             | -                               | -                             |
| T7  | 0.89 (0.01)                     | -                             | 0.86 (0.01)                     | -                             | 0.77 (0.01)                     | -                             |
| L8  | 0.73 (0.02)                     | 204.1 (11.7)                  | -                               | -                             | -                               | -                             |
| T9  | 0.74 (0.01)                     | 69.5 (5.1)                    | 0.78 (0.01)                     | -                             | -                               | -                             |
| K11 | 0.86 (0.01)                     | -                             | 0.86 (0.01)                     | -                             | 0.87 (0.02)                     | -                             |
| T12 | 0.82 (0.01)                     | -                             | 0.87 (0.02)                     | -                             | 0.83 (0.01)                     | -                             |
| I13 | 0.91 (0.02)                     | 154.0 (68.2)                  | 0.86 (0.01)                     | 90.3 (35.7)                   | 0.82 (0.02)                     | 150.4 (30.0)                  |
| T14 | 0.86 (0.01)                     | -                             | 0.90 (0.02)                     | -                             | 0.85 (0.01)                     | -                             |
| E16 | 0.91 (0.01)                     | -                             | 0.86 (0.02)                     | 95.9 (42.7)                   | 0.84 (0.01)                     | -                             |
| V17 | -                               | -                             | 0.89 (0.01)                     | -                             | 0.88 (0.01)                     | -                             |
| P19 | 0.89 (0.01)                     | -                             | 0.86 (0.01)                     | -                             | 0.81 (0.01)                     | -                             |
| S20 | 0.87 (0.01)                     | 51.2 (22.9)                   | 0.85 (0.01)                     | -                             | 0.82 (0.01)                     | -                             |
| D21 | 0.92 (0.01)                     | 213.8 (53.4)                  | 0.94 (0.01)                     | -                             | -                               | -                             |
| T22 | -                               | -                             | 0.86 (0.01)                     | 112.0 (62.8)                  | 0.92 (0.01)                     | -                             |
| E24 | -                               | -                             | 0.91 (0.01)                     | -                             | 0.89 (0.01)                     | -                             |
| V26 | -                               | -                             | 0.91 (0.01)                     | -                             | 0.79 (0.02)                     | 266.8 (31.4)                  |
| K27 | 0.88 (0.03)                     | -                             | 0.87 (0.02)                     | -                             | -                               | -                             |
| A28 | 0.97 (0.01)                     | -                             | 0.92 (0.01)                     | -                             | 0.87 (0.01)                     | -                             |
| K29 | 0.92 (0.04)                     | -                             | 0.85 (0.01)                     | 105.1 (53.6)                  | 0.90 (0.01)                     | -                             |

|     |             |              |             |              |             |              |
|-----|-------------|--------------|-------------|--------------|-------------|--------------|
| I30 | 0.87 (0.02) | -            | 0.92 (0.01) | -            | -           | -            |
| Q31 | 0.93 (0.02) | -            | 0.90 (0.01) | -            | 0.89 (0.01) | -            |
| D32 | 0.92 (0.01) | -            | 0.89 (0.01) | -            | 0.87 (0.01) | -            |
| K33 | 0.90 (0.01) | -            | 0.86 (0.02) | -            | -           | -            |
| E34 | 0.91 (0.01) | -            | 0.88 (0.01) | -            | 0.85 (0.01) | -            |
| P38 | -           | -            | 0.89 (0.01) | -            | 0.85 (0.01) | -            |
| D39 | 0.91 (0.01) | -            | 0.86 (0.01) | -            | 0.84 (0.01) | -            |
| Q40 | 0.94 (0.02) | -            | 0.90 (0.01) | -            | 0.88 (0.01) | -            |
| Q41 | -           | -            | 0.94 (0.01) | -            | -           | -            |
| R42 | 0.89 (0.01) | -            | 0.92 (0.01) | -            | 0.89 (0.02) | -            |
| L43 | 0.87 (0.01) | -            | 0.94 (0.01) | -            | 0.82 (0.02) | -            |
| I44 | -           | -            | 0.82 (0.01) | -            | 0.84 (0.01) | -            |
| F45 | 0.89 (0.01) | 128.0 (68.6) | -           | -            | -           | -            |
| A46 | 0.82 (0.02) | 112.7 (26.5) | 0.79 (0.01) | -            | 0.71 (0.03) | 137.9 (26.7) |
| K48 | -           | -            | 0.81 (0.01) | -            | -           | -            |
| Q49 | 0.90 (0.01) | -            | 0.86 (0.01) | -            | 0.84 (0.01) | -            |
| L50 | -           | -            | 0.89 (0.01) | -            | 0.87 (0.01) | -            |
| E51 | 0.91 (0.01) | -            | 0.86 (0.01) | -            | 0.86 (0.01) | -            |
| R54 | 0.92 (0.01) | -            | 0.88 (0.01) | -            | 0.89 (0.01) | -            |
| T55 | 0.84 (0.01) | -            | 0.88 (0.01) | -            | 0.88 (0.01) | -            |
| L56 | -           | -            | -           | -            | 0.94 (0.01) | -            |
| S57 | 0.92 (0.02) | -            | 0.92 (0.01) | -            | 0.91 (0.02) | -            |
| D58 | 0.97 (0.02) | -            | 0.92 (0.01) | -            | 0.91 (0.01) | -            |
| Y59 | 0.88 (0.02) | -            | 0.92 (0.01) | -            | 0.89 (0.01) | -            |
| N60 | 0.87 (0.02) | -            | 0.81 (0.01) | -            | 0.81 (0.01) | -            |
| I61 | 0.88 (0.01) | -            | 0.87 (0.01) | -            | 0.84 (0.01) | -            |
| Q62 | -           | -            | 0.81 (0.01) | 53.0 (27.8)  | 0.81 (0.01) | -            |
| K63 | 0.92 (0.01) | -            | 0.88 (0.02) | -            | 0.83 (0.01) | -            |
| E64 | 0.87 (0.01) | -            | 0.83 (0.01) | -            | 0.85 (0.01) | -            |
| S65 | 0.90 (0.01) | -            | 0.90 (0.01) | -            | 0.85 (0.01) | -            |
| T66 | 0.85 (0.01) | -            | 0.84 (0.01) | -            | 0.81 (0.01) | -            |
| L67 | 0.92 (0.01) | -            | 0.90 (0.01) | -            | 0.92 (0.01) | -            |
| H68 | 0.94 (0.01) | -            | 0.89 (0.01) | -            | 0.90 (0.01) | -            |
| L69 | 0.93 (0.02) | -            | 0.91 (0.01) | -            | 0.86 (0.01) | -            |
| V70 | 0.91 (0.01) | 107.7 (16.5) | 0.83 (0.01) | 204.3 (20.6) | -           | -            |
| L71 | 0.81 (0.02) | 208.1 (21.2) | 0.77 (0.02) | 167.5 (17.7) | -           | -            |
| R72 | 0.62 (0.02) | 306.1 (11.7) | 0.57 (0.02) | 329.9 (35.6) | -           | -            |
| L73 | 0.43 (0.01) | 384.6 (6.3)  | 0.33 (0.01) | 339.6 (26.3) | -           | -            |
| R74 | 0.28 (0.01) | 319.7 (5.3)  | -           | -            | -           | -            |

<sup>a)</sup>Errors in  $S^2_{CaD\alpha}$  and  $\tau_f$  as established from Monte-Carlo simulations<sup>3</sup> are shown in parentheses. <sup>b)</sup> $\tau_f$  values (in picoseconds) are reported only for the residues that could not be fit to the single-parameter ( $S^2_{CaD\alpha}$  only) Lipari-Szabo spectral density function<sup>4,5</sup> with 5% probability of exceeding  $\chi^2$ .<sup>6</sup>

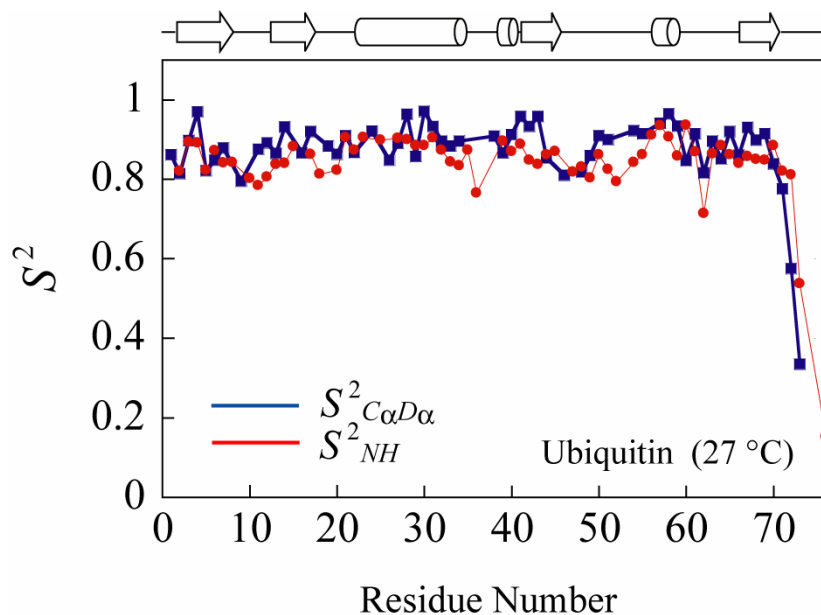

**Figure S5.** D<sup>α</sup>-derived  $S^2_{C\alpha D\alpha}$  (blue rectangles and lines) and <sup>15</sup>N-derived  $S^2_{NH}$  (red circles and lines) in ubiquitin (27°C) obtained using common global diffusion tensor parameters ( $\tau_{c,eff} = (2D_{||} + 4D_{\perp})^{-1} = 4.05$  ns;  $D_{||}/D_{\perp} = 1.20$ ;  $\theta = 7^\circ$ ;  $\phi = -12^\circ$ ) and  $QCC = 171$  kHz, plotted as a function of the protein sequence. A schematic representation of the secondary structure of ubiquitin is shown at the top of the plot:  $\beta$ -strands are depicted with arrows, while  $\alpha$ -helices are represented with cylinders.

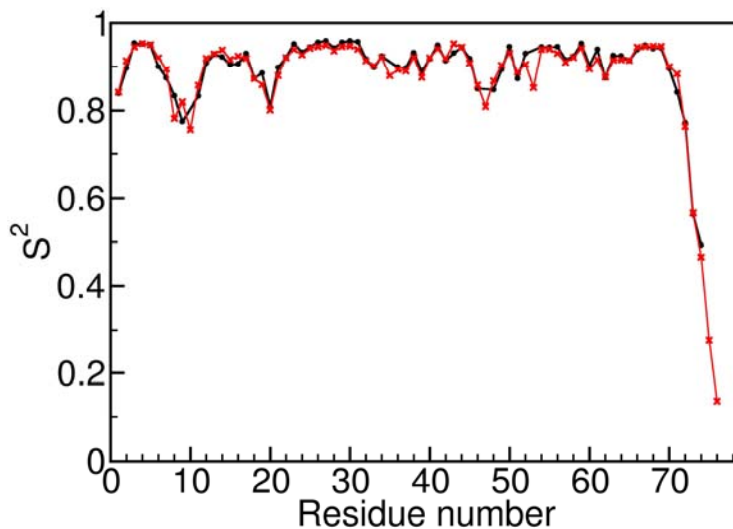

**Figure S6.** Comparison of  $S^2_{C\alpha D\alpha}$  (red, 'x' symbols) with  $S^2_{C\alpha C\beta}$  (black, filled circles) order parameters derived from the 1- $\mu$ s MD trajectory of ubiquitin (27°C) averaged over a 5-ns time window. See 'Materials and Methods' for the details of MD simulations.

## References

- (1) Vijay-Kumar, S.; Bugg, C. E.; Cook, W. J. *J. Mol. Biol.* **1987**, *194*, 531-544.
- (2) Frericks-Schmidt, H. L.; Sperling, L. J.; Gao, Y. G.; Wylie, B. J.; Boettcher, J. M.; Wilson, S. R.; Rienstra, C. M. *J. Phys. Chem. B* **2007**, *111*, 14362-14369.
- (3) Kamith, U.; Shriver, J. W. *J. Biol. Chem.* **1989**, *264*, 5586-5592.
- (4) Lipari, G.; Szabo, A. *J. Am. Chem. Soc.* **1982**, *104*, 4546-4559.
- (5) Lipari, G.; Szabo, A. *J. Am. Chem. Soc.* **1982**, *104*, 4559-4570.
- (6) Bevington, P. R.; Robinson, D. K. *Data Reduction and Error Analysis for the Physical Sciences*; WCB/McGraw-Hill, New York, 1992.
